# Supplementary material
Source: Springer Nature journal article supplement (https://www.springermedizin.de/resource/supplementary/12906_2012_1131_MOESM23_ESM.pdf/9520352)
Supplement: MOESM23 [file 9520352]

$$\text{Predicted } SC_i = \text{argmax}(TSCORE_{i,j=1}, TSCORE_{i,j=2}, TSCORE_{i,j=3})$$

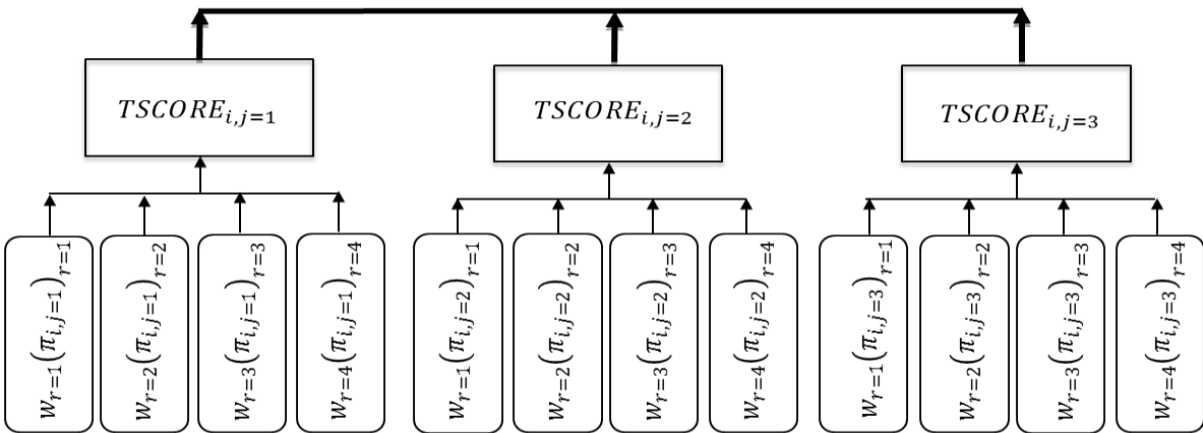

$i = 1, 2, \dots, n$      $j = 1: TE, j = 2: SE, j = 3: SY$

$r = 1: \text{Face}, r = 2: \text{Body shape}, r = 3: \text{Voice}, r = 4: \text{Questionnaire}$
